# Supplementary material
Source: publisher figshare collection journal article supplement (https://asha.figshare.com/articles/dataset/_/16639510)
Supplement: Supplementary file 2 [file 1]

**Supplemental Material S3.** Response rates for qualitative questions (for all primary questions, e.g., not those that branched off).

| Response Rate %<br>Section | Survey Question                                                                                                                                                                                                         |
|----------------------------|-------------------------------------------------------------------------------------------------------------------------------------------------------------------------------------------------------------------------|
| Section 1                  |                                                                                                                                                                                                                         |
| 94.0                       | How would you describe yourself?                                                                                                                                                                                        |
| 94.0                       | How old are you?                                                                                                                                                                                                        |
| 94.0                       | What is your gender?                                                                                                                                                                                                    |
| 94.0                       | In which country are you currently practicing and/or doing research?                                                                                                                                                    |
| 94.0                       | What is your highest earned degree?                                                                                                                                                                                     |
| 93.0                       | How many years have you been involved in aphasia assessment or rehabilitation?                                                                                                                                          |
| 94.0                       | In what settings do you work or have you previously worked with people with aphasia?                                                                                                                                    |
| 93.5                       | Of the above settings, which setting is the primary setting in which you collect discourse data?                                                                                                                        |
| Section 2                  |                                                                                                                                                                                                                         |
| 82.1                       | Of the speakers with aphasia that you see/assess, how often do you collect and/or analyze spoken discourse samples from speakers with aphasia in a clinical or research setting?                                        |
| 82.1                       | Why do you collect spoken discourse data?                                                                                                                                                                               |
| 82.1                       | What type(s) of discourse genres do you collect to evaluate spoken language in aphasia?                                                                                                                                 |
| 81.1                       | What approaches do you utilize to collect and/or analyze spoken discourse samples?                                                                                                                                      |
| 80.6                       | What do you feel are your barriers to discourse sample collection?                                                                                                                                                      |
| 80.6                       | What do you feel are your barriers to discourse transcription?                                                                                                                                                          |
| 80.1                       | What do you feel are your barriers to discourse analysis?                                                                                                                                                               |
| 80.1                       | What do you feel are your barriers to discourse analysis interpretation?                                                                                                                                                |
| Section 3                  |                                                                                                                                                                                                                         |
| 73.1                       | Over the course of assessing and/or treating an individual (for clinical or research purposes), how many samples (i.e., discourse tasks) do you typically collect and/or analyze per speaker?                           |
| 72.6                       | Over the course of assessing and/or treating an individual (for clinical or research purposes), how many discourse genres (e.g., story retell, personal narrative) do you typically collect and/or analyze per speaker? |
| 73.1                       | Over the course of assessing and/or treating an individual (for clinical or research purposes), how many samples would you ideally like to collect and/or analyze per speaker?                                          |
| 73.1                       | Where do you collect the spoken discourse samples?                                                                                                                                                                      |
| 73.1                       | Do you record the spoken discourse data you collect?                                                                                                                                                                    |
| 73.1                       | Typically, how long is each recorded discourse sample?                                                                                                                                                                  |
| Section 4                  |                                                                                                                                                                                                                         |
| 54.7                       | Once the spoken discourse data are collected, what are the steps undertaken?                                                                                                                                            |
| 71.6                       | How often are samples transcribed?                                                                                                                                                                                      |
| 71.6                       | How often do you personally transcribe the collect discourse samples?                                                                                                                                                   |
| 71.6                       | How often are samples coded?                                                                                                                                                                                            |
| 71.1                       | How often do you personally code the transcribed discourse samples?                                                                                                                                                     |
| 69.2                       | How often are samples analyzed?                                                                                                                                                                                         |
| 68.7                       | How often do you personally analyze the transcribed discourse samples?                                                                                                                                                  |
| 65.2                       | How are the discourse samples analyzed?                                                                                                                                                                                 |
| 61.2                       | Do you personally train your raters?                                                                                                                                                                                    |
| 61.2                       | Is there a specific training protocol to train raters on transcription, coding, and/or analysis?                                                                                                                        |
| 60.7                       | What are the ways you (or people you train) determine utterance boundaries when transcribing?                                                                                                                           |
| 60.7                       | What specific discourse measures do you extract most often from spoken discourse analysis?                                                                                                                              |
| 60.2                       | How do you select your discourse outcome measures?                                                                                                                                                                      |

|           |                                                                                                                                                                                                                                    |
|-----------|------------------------------------------------------------------------------------------------------------------------------------------------------------------------------------------------------------------------------------|
| 60.2      | Thinking about people involved in transcribing, coding and/or analysis of discourse data, what are the typical education backgrounds of these people?                                                                              |
| Section 5 |                                                                                                                                                                                                                                    |
| 57.7      | Select all times when you collect data regarding inter-rater and/or intra-rater reliability                                                                                                                                        |
| 57.7      | How often do you evaluate the psychometric information (e.g., reliability, validity, and acceptability) of the measures you use for spoken discourse analysis?                                                                     |
| 57.2      | Regarding rater reliability, indicate what discourse-derived measures you consistently check for reliability                                                                                                                       |
| 57.2      | To quantify inter- or intra-rater reliability, what metrics do you typically employ?                                                                                                                                               |
| 57.2      | How often do you collect test-retest data for your samples?                                                                                                                                                                        |
| 55.2      | In general, do you actively look for psychometric properties of discourse outcomes prior to choosing them?                                                                                                                         |
| 54.7      | In general, do you feel that there is adequate data evaluating psychometric properties of spoken discourse outcome measures?                                                                                                       |
| 54.7      | Do you actively look for whether normative data is available for the discourse outcome measures prior to choosing them?                                                                                                            |
| 54.7      | Do you currently feel that there is adequate normative data on discourse-derived measures?                                                                                                                                         |
| 54.7      | If there was a database of psychometric properties and/or normative data of discourse outcomes in speakers with and without aphasia across a variety of discourse tasks, would this be useful?                                     |
| 54.7      | What are your barriers to collecting psychometric data?                                                                                                                                                                            |
| 54.7      | Do you go to any resource (freely available) to identify what information to report in your clinical report/research study regarding spoken discourse example? (e.g., reporting rater reliability, inclusion/exclusion parameters) |
