# Supplementary material
Source: publisher figshare collection journal article supplement (https://asha.figshare.com/articles/dataset/_/16639510)
Supplement: Supplementary file 3 [file 1]

**Supplemental Material S2.** Response rates for quantitative questions (for all primary questions, e.g., not those that branched off).

| Response Rate | Survey Question                                                                                                                                                                                                                                  |
|---------------|--------------------------------------------------------------------------------------------------------------------------------------------------------------------------------------------------------------------------------------------------|
| 83.3          | If you have selected 'other' as an option, please describe the reasons for why you collect spoken discourse data.                                                                                                                                |
| 100.0         | If you have selected 'other' as an option, please list the type of discourse genres you collect to evaluate spoken language in aphasia.                                                                                                          |
| 98.2          | If you have selected 'other' as an option or if you use a self-developed protocol, please provide details about the approaches that you use to collect and analyze spoken discourse samples.                                                     |
| 100.0         | If you have selected 'other' as an option, please describe other factors that may pose as your barriers to discourse sample collection.                                                                                                          |
| 100.0         | If you have selected 'other' as an option, please describe other factors that may pose as your barriers to discourse transcription.                                                                                                              |
| 100.0         | If you have selected 'other' as an option, please describe other factors that may pose as your barriers to discourse analysis.                                                                                                                   |
| 100.0         | If you have selected 'other' as an option, please describe other factors that may pose as your barriers to discourse analysis interpretation.                                                                                                    |
| 100.0         | If you have selected 'other' as an option, please mention the location or type of setting you collect spoken discourse samples.                                                                                                                  |
| 100.0         | If you have selected 'other' as an option, please describe how you analyze your spoken discourse data (if not recorded)?                                                                                                                         |
| 80.0          | If you have selected 'other', please list the personnel who is involved in the recording of spoken discourse samples.                                                                                                                            |
| 100.0         | If you have selected 'other' as an option, please describe the steps you undertake once the discourse data is collected.                                                                                                                         |
| 44.1          | If discourse samples are not transcribed, please describe your reasons for not transcribing the samples.                                                                                                                                         |
| 73.7          | If you personally do not always transcribe the discourse samples, please list the other personnel who transcribe the discourse samples you collect. If other, please describe.                                                                   |
| 41.3          | If discourse transcriptions are not coded, please describe your reasons for not coding the samples.                                                                                                                                              |
| 61.9          | If you personally do not always code the discourse samples, please list the other personnel who code the discourse transcriptions. If other, please describe.                                                                                    |
| 26.3          | If discourse samples are not analyzed, please describe your reasons for not analyzing the collected samples.                                                                                                                                     |
| 72.7          | If you personally do not always analyze the discourse samples, please list the other personnel who analyze the discourse samples you collect. If other, please describe.                                                                         |
| 100.0         | If you have answered 'other', please specify how you analyze your discourse samples                                                                                                                                                              |
| 24.3          | Who trains the raters? Please note if this trainer is consistent, and/or the training method (e.g. a video).                                                                                                                                     |
| 100.0         | Please elaborate on the protocol that is used to train your re-raters on transcription, coding, and/or analysis. Please also mention who created this protocol (if that is known) and how long your lab / clinic has used it.                    |
| 55.6          | If you would like to share where your information is kept, please include a link here:                                                                                                                                                           |
| 70.6          | If you have answered 'other', please describe how you differentiate utterance for analysis.                                                                                                                                                      |
| 9.00          | Please list any other specific discourse measures (in addition to the ones listed above) you use most often in spoken discourse analysis. Please also indicate how frequently you use these measures (i.e., rarely, sometimes, usually, always). |
| 93.3          | If you have answered 'other', please describe how you select your discourse outcome measures.                                                                                                                                                    |
| 100.0         | If you have answered 'other', please mention the educational background of your raters.                                                                                                                                                          |

|      |                                                                                                                                                                                                                                                            |
|------|------------------------------------------------------------------------------------------------------------------------------------------------------------------------------------------------------------------------------------------------------------|
| 77.4 | If you do not collect inter- or intra-rater reliability data, please elaborate on the reasons why not. (If you do not collect inter- or intra-rater reliability data, please elaborate on the reasons why not.                                             |
| 50.0 | If the reliability is checked, who is involved in the reliability check? (Mark all that apply)                                                                                                                                                             |
| 11.1 | If applicable, please list the tool (e.g., manual checking, software) that you use to check reliability.                                                                                                                                                   |
| 4.8  | If applicable, please elaborate on how you choose which measures to assess inter- and intra-rater reliability.                                                                                                                                             |
| 83.3 | If other, please list other metrics you use to quantify inter- or intra-rater reliability                                                                                                                                                                  |
| 25.3 | If not always, please describe reasons for not collecting test-retest data                                                                                                                                                                                 |
| 26.2 | Please describe the reason(s) why you actively look for psychometric properties of discourse outcomes prior to choosing them.                                                                                                                              |
| 72.7 | Please describe the reasons(s) why you do not actively look for psychometric properties of discourse outcomes prior to choosing them.                                                                                                                      |
| 13.8 | Please elaborate on specific psychometric properties you are most interested in.                                                                                                                                                                           |
| 21.2 | Please describe the reason(s) why you actively look for whether normative data are available for the discourse outcome measures prior to choosing them.                                                                                                    |
| 69.7 | Please describe the reason(s) why you do not actively look for whether normative data are available for the discourse outcome measures prior to choosing them.                                                                                             |
| 25.4 | If there was a database of psychometric properties and/or normative data of discourse outcomes in speakers with and without aphasia across a variety of discourse tasks (e.g., hosted on AphasiaBank, for instance), would this be useful? Why or why not? |
| 90.9 | If you have answered 'other', please describe your other barriers to collecting psychometric data.                                                                                                                                                         |
| 14.3 | Please share a few insights into how to facilitate using, analyzing, and publishing spoken discourse data in aphasia.                                                                                                                                      |
